# Supplementary material for: In Situ Hybridization of PRRSV-1 Combined with Digital Image Analysis in Lung Tissues of Pigs Challenged with PRRSV-1
Source: MDPI journal article supplement (doi:10.3390/vetsci8100235), 2021-10-15

Quantification of PRRSV-infected cells labeled by *in situ* hybridization in porcine lung tissues with QuPath software (version 0.1.2)

1. Open QuPath.
2. Create a new project, optimally in an empty folder with the name of the project or experiment.
3. Add and import images with the default settings.
4. Double click on the image.
5. Set image type to Brightfield.
6. Create an annotation of 2,37mm<sup>2</sup> representative of the section. If the annotations window is open, the size of the area can be seen in parallel with the selection.
7. Run the positive cell detection from the cell detection command within the analyze tab. Use the default settings.
8. Retrieve the results with the show detection measurements or show annotation measurements command from the measure tab.
9. Repeat for other added slides as appropriate.

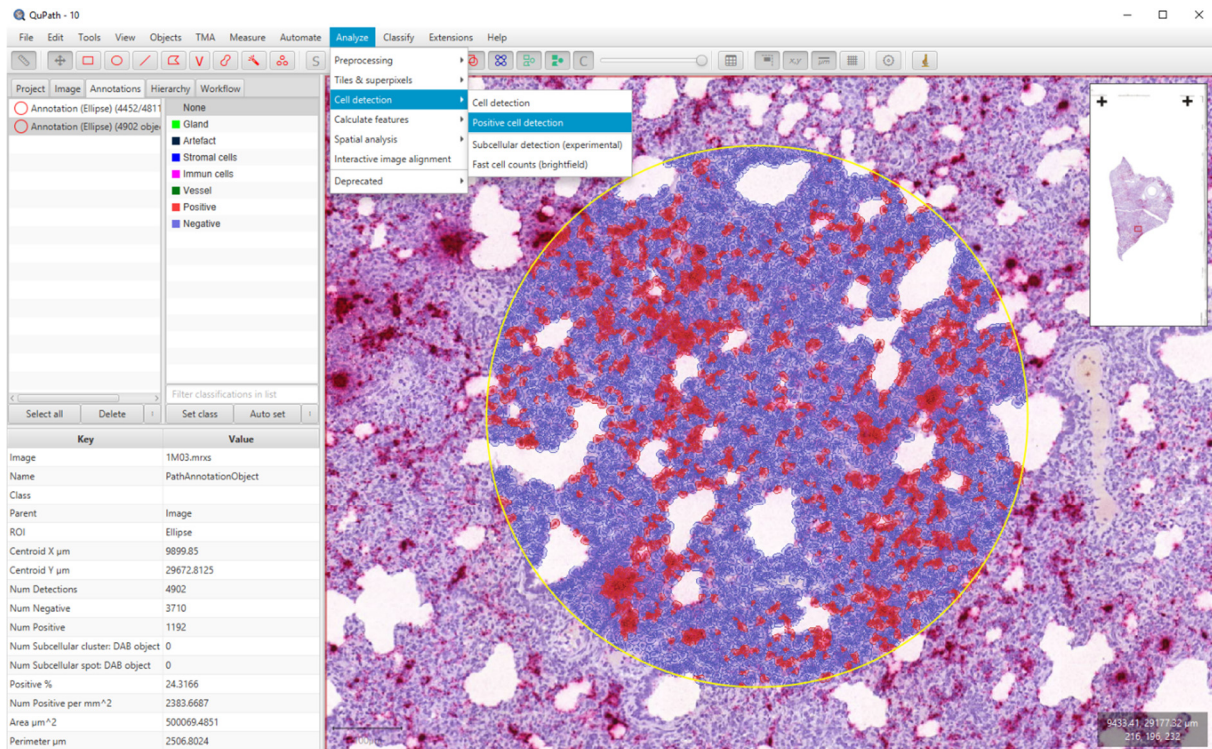

### Supplementary Table S1

Parameter estimates of the beta regression model fitted on the proportion of RNAscope ISH labelled PRRSV positive cells and the log10 of the genome copy numbers detected by qPCR. The estimates and their standard error (*Estimate (SE)*) are backtransformed from the logarithm scale. They represent the fold change in the ratio of the positive cells compared to the negative ones, when the log10 of the genome copy numbers detected by qPCR is raised by 1 unit.

| Coefficients      | Estimate (SE)        | p value |
|-------------------|----------------------|---------|
| Intercept         | 4.5155e-06 (13.8507) | <0.0001 |
| log10 Genome Copy | 2.3586 (1.2725)      | 0.0004  |

### Supplementary Table S2

Parameter estimates of the beta regression model fitted on the proportion of RNAscope ISH labelled PRRSV positive cells and overall histological severity. The estimates and their standard error (*Estimate (SE)*) are backtransformed from the logarithm scale. They represent the fold change in the ratio of the positive cells compared to the negative ones, when the overall histological severity is raised by 1 unit.

| Coefficients     | Estimate (SE)   | p value |
|------------------|-----------------|---------|
| Intercept        | 0.0193 (2.0069) | <0.0001 |
| Overall severity | 1.0074 (1.0055) | 0.1806  |

### Supplementary Table S3

Parameter estimates of the beta regression model fitted on the proportion of RNAscope ISH labelled PRRSV positive cells and the scores obtained for the ISH stained left medial lobe. The estimates and their standard error (*Estimate (SE)*) are backtransformed from the logarithm scale. They represent the fold change in the ratio of the positive cells compared to the negative ones, when the scores obtained for the ISH stained left medial lobe is raised by 1 unit.

| Coefficients         | Estimate (SE)   | p value |
|----------------------|-----------------|---------|
| Intercept            | 0.0145 (2.3077) | <0.0001 |
| Medial lobe severity | 1.064 (1.0435)  | 0.1455  |

### Supplementary Figure S1

Proportion of the PRRSV ISH positive cells and the log<sub>10</sub> of the genome copy numbers detected by qPCR. The red line indicates the fitted curve from the respective beta regression model.

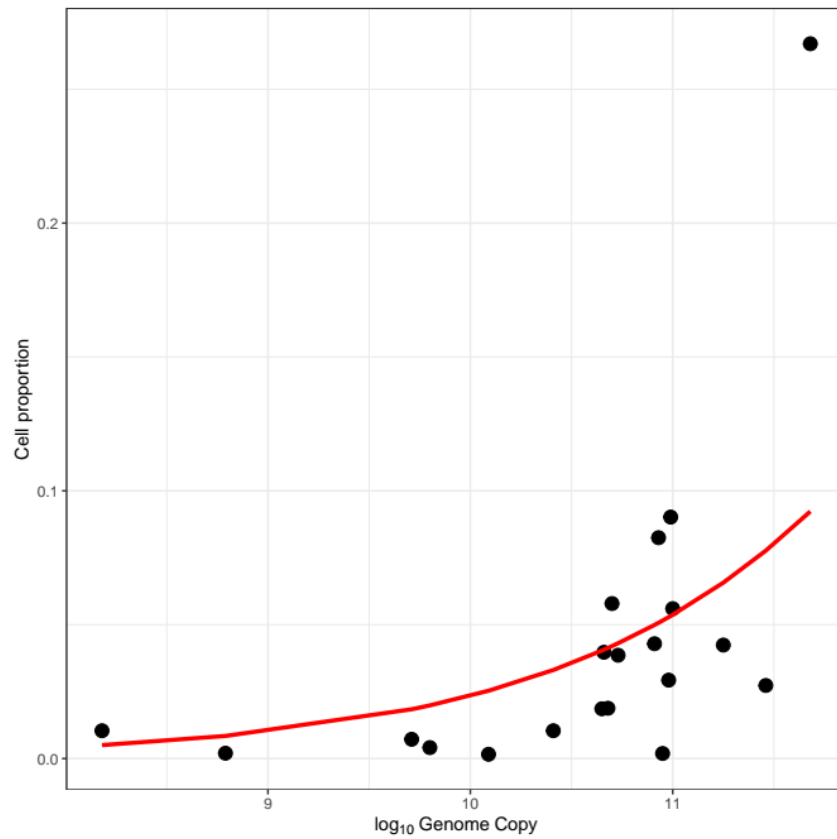

### Supplementary Figure S2

Proportion of the PRRSV ISH positive cells and the overall histological severity. The red line indicates the fitted curve from the respective beta regression model.

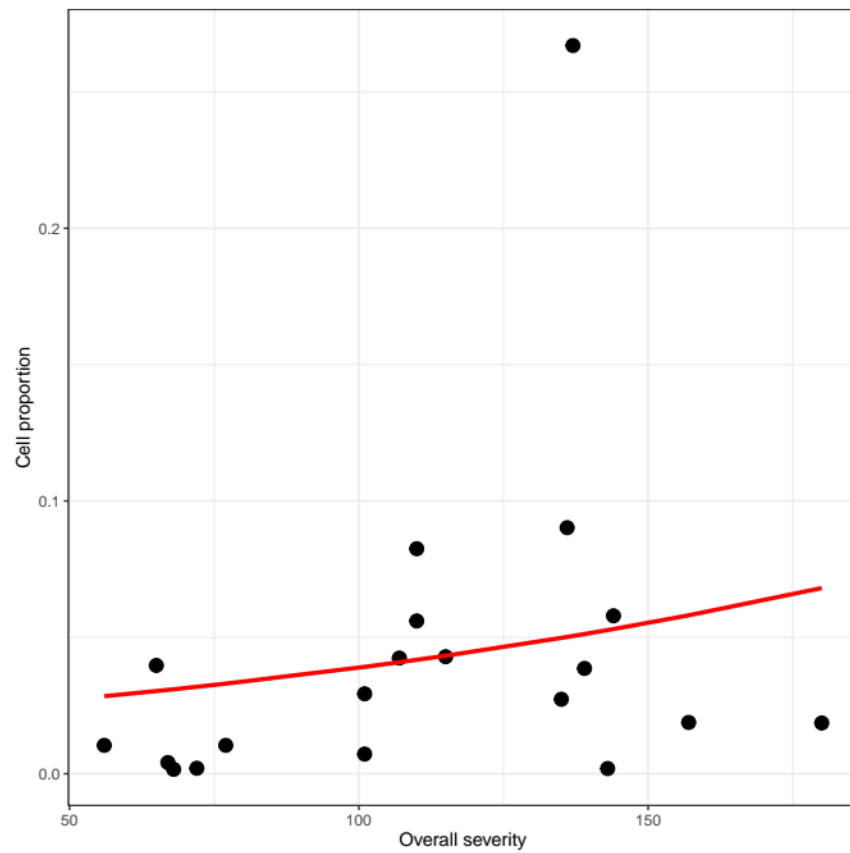

### Supplementary Figure S3

Proportion of the PRRSV ISH positive cells and the scores obtained for the ISH stained left medial lobe. The red line indicates the fitted curve from the respective be

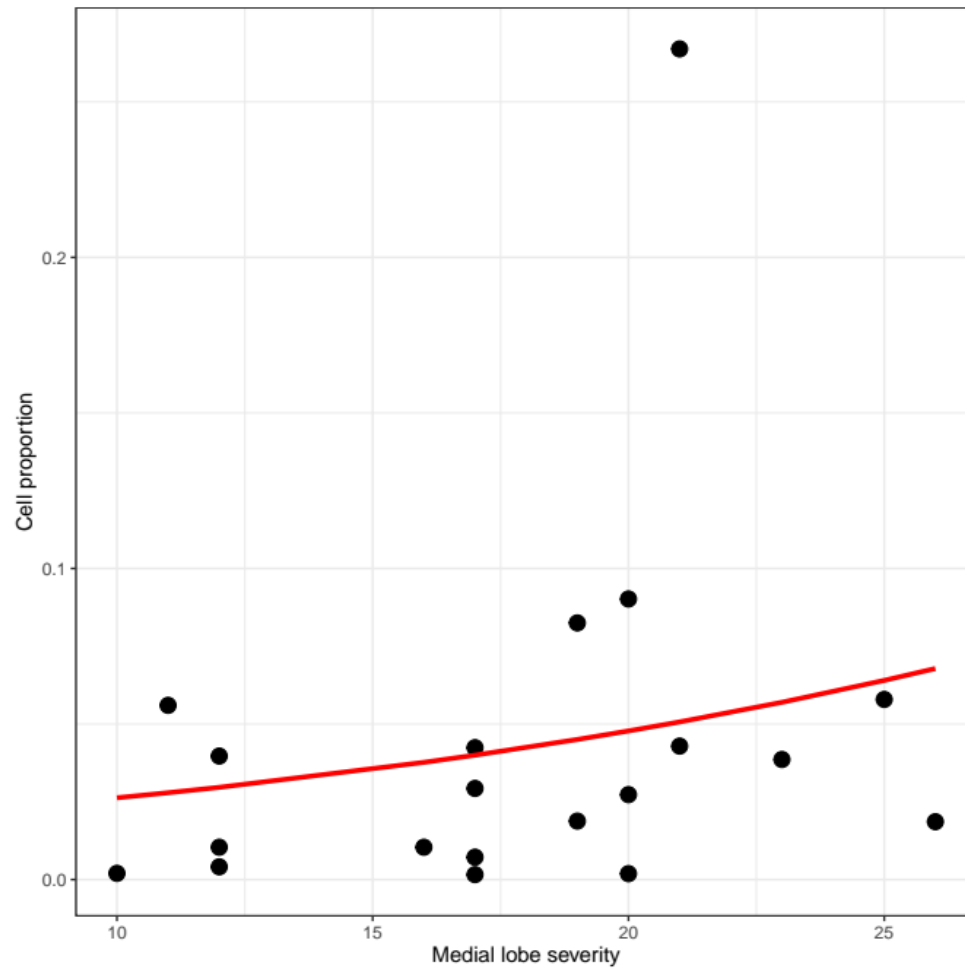

Supplement: s1 [file s1]
